## OBSERVATIONS

## Increasing the Low-Glucose Alarm of a Continuous Glucose Monitoring System Prevents Exercise-Induced Hypoglycemia Without Triggering Any False Alarms

The use of continuous glucose monitoring systems (CGMSs) with low-glucose alarms is advocated as a means to decrease the risk of hypoglycemia in type 1 diabetes. Unfortunately, marked mismatches between CGMS readings and actual blood glucose (BG) concentrations limit the usefulness of CGMS in preventing hypoglycemia (1). Although we showed recently that raising the alarm level to compensate for this mismatch decreases the incidence and duration of hypoglycemic episodes, this results in an unacceptably high rate of false alarms (1), defined as an alarm triggered when BG levels are greater than the alarm threshold. This is an important issue because repeated exposure to false alarms can discourage individuals from using their CGMSs (2). Given that CGMSs overestimate BG levels when they rapidly decline (3,4), we propose that raising the CGMS alarm in anticipation of a rapid fall in glycemia could be one condition where the incidence of hypoglycemia may be reduced without triggering any false alarms.

To test this hypothesis, four males and four females with uncomplicated type 1 diabetes and unimpaired awareness of hypoglycemia (age  $31.5 \pm 6.9$  years; BMI  $24.8 \pm 2.5$  kg/m<sup>2</sup>;  $VO_{2\text{peak}}$   $43.2 \pm 4.9$  mL/kg/min; diabetes duration  $10.6 \pm 8.3$  years; HbA<sub>1c</sub>  $7.5 \pm 1.1\%$ ; mean  $\pm$  SD) wore a CGMS (abdomen; Paradigm 722 Real-Time; Medtronic, Northridge, CA) and attended the laboratory within  $1.9 \pm 0.2$  h of breakfast and their usual insulin bolus ( $8.4 \pm 5.1$  units). When BG levels fell to between 8–10 mM,

participants exercised for 30 min (40%  $VO_{2\text{peak}}$ ) on a cycle ergometer to induce a rapid fall in glycemia (5). During and for 2-h postexercise, the CGMS alarm was either switched off or set to 4.0 or 5.5 mM, with each treatment administered on consecutive mornings following a randomized counterbalanced design. Participants were treated with carbohydrates when an alarm was accompanied by a confirmed BG level  $\leq$  the alarm threshold or in response to the verbal expression of hypoglycemic symptoms. One-way repeated-measures ANOVA and Bonferroni post hoc tests compared differences in BG and CGMS levels. Hypoglycemic events were compared using a Fisher exact squared test.

In response to exercise, all participants in both the no alarm and 4.0 mM alarm conditions experienced an episode of hypoglycemia, defined as a confirmed BG level  $<3.8$  mM (ABL 700 series; Radiometer, Copenhagen, Denmark), with no cases of false alarms in the 4.0 mM treatment. In comparison, the 5.5 mM alarm significantly reduced by half the proportion of hypoglycemic episodes ( $P = 0.048$ ) with no cases of false alarms. When the 5.5 mM alarm was triggered, CGMS overestimated BG values by  $1.6 \pm 0.3$  mM.

Our findings show for the first time that when glycemia is falling, the use of CGMS alarms can provide an effective means to reduce the risk of hypoglycemia without the inconvenience of false alarms. Although setting the CGMS alarm at 5.5 mM did not prevent all cases of hypoglycemia because of the large overestimation of BG levels by the CGMS, this mismatch had the benefit of contributing to the absence of false alarms. In conclusion, future diabetes management guidelines should highlight the benefits of using CGMS alarms for the prevention of hypoglycemia when a rapid fall in glycemia is anticipated.

KATHERINE E. ISCOE, MSc<sup>1</sup>  
RAYMOND J. DAVEY, PhD<sup>1,2</sup>  
PAUL A. FOURNIER, PhD<sup>1</sup>

From <sup>1</sup>The School of Sport Science, Exercise & Health, The University of Western Australia, Perth, Western Australia, Australia; and the <sup>2</sup>Telethon Institute for Child Health Research, Centre for Child Health Research, The University

of Western Australia, Perth, Western Australia, Australia.

Corresponding author: Katherine E. Iscoe, iscoek01@student.uwa.edu.au.

DOI: 10.2337/dc10-2243

© 2011 by the American Diabetes Association.

Readers may use this article as long as the work is properly cited, the use is educational and not for profit, and the work is not altered. See <http://creativecommons.org/licenses/by-nc-nd/3.0/> for details.

**Acknowledgments**—K.E.I. has received speaking fees from Medtronic. No other potential conflicts of interest relevant to this article were reported.

K.E.I. collected the data and wrote and edited the manuscript. R.J.D. contributed to the study design and reviewed and edited the manuscript. P.A.F. supervised the study, contributed to the study design, and reviewed and edited the manuscript.

Parts of this study were presented at the 70th Scientific Sessions of the American Diabetes Association, Orlando, Florida, 25–29 June 2010.

The authors acknowledge Medtronic Australasia, which provided the CGMSs and glucose sensors for the completion of this study.

### References

- Davey RJ, Jones TW, Fournier PA. Effect of short-term use of a continuous glucose monitoring system with a real-time glucose display and a low glucose alarm on incidence and duration of hypoglycaemia in a home setting in type 1 diabetes mellitus. *J Diabetes Sci Technol* 2010;4:1457–1464
- Buckingham B, Block J, Burdick J, et al.; Diabetes Research in Children Network. Response to nocturnal alarms using a real-time glucose sensor. *Diabetes Technol Ther* 2005;7:440–447
- Boyne MS, Silver DM, Kaplan J, Saudek CD. Timing of changes in interstitial and venous blood glucose measured with a continuous subcutaneous glucose sensor. *Diabetes* 2003;52:2790–2794
- Davey RJ, Low CY, Fournier PA. The contribution of an intrinsic lag of CGMS to differences in measured and actual glucose concentrations changing at variable rates in vitro. *J Diabetes Sci Technol* 2010;4:1393–1399
- Guelfi KJ, Jones TW, Fournier PA. The decline in blood glucose levels is less with intermittent high-intensity compared with moderate exercise in individuals with type 1 diabetes. *Diabetes Care* 2005;28:1289–1294
